# Supplementary material
Source: Springer Nature journal article supplement (https://www.springermedizin.de/resource/supplementary/13063_2013_1923_MOESM2_ESM.pdf/9621510)
Supplement: MOESM2 [file 9621510]

## **The LOCAT Group**

### ***LOCAT Office Staff***

Jae Yeon Heo, Cho Hee Kim, Yousun Ko, Ji Eun Lee, Min Jung Lee, Ri Young Na, Eun Jung Shin

### ***Study conception, organization, funding, study design, site accrual, and manuscript drafting***

Kyoung Ho Lee (Seoul National University Bundang Hospital)

### ***Participant/site accrual***

Kyuseok Kim (Seoul National University Bundang Hospital)

### ***Site accrual***

Chang Hee Lee (Korea University Guro Hospital)

### ***Study design and manuscript drafting***

Soyeon Ahn (Seoul National University Bundang Hospital)

Ji Hoon Park (Seoul National University Bundang Hospital)

### ***CT radiation dose calibration***

Yong Hwan Chung (Seoul National University Bundang Hospital)

Bon Seung Gu (Seoul National University Bundang Hospital)

***Radiologist training program***

Jeon Min Cho (Seoul National University)

Bohyoung Kim (Seoul National University Bundang Hospital)

Min Hee Lee (Soonchunhyang University Bucheon Hospital)

Hyun Sik Woo (SMG-SNU Boramae Medical Center)

Hyun Kyung Yang (Seoul National University Bundang Hospital)

***CT report quality control***

Min-Jeong Kim (Hallym University Sacred Heart Hospital)

***Pathologic examination quality control***

Hye Seung Lee (Seoul National University Bundang Hospital)

***Surgical management quality control***

Sung-Bum Kang (Seoul National University Bundang Hospital)

***Radiation hazard estimation***

Kwang Pyo Kim (Kyung Hee University)

***Insurance***

Hyuk Jung Kim (Daejin Medical Center Bundang Jesaeng General Hospital)

***Participating Sites***

**Ajou University Hospital: Young Chul Kim\***

**Chung-Ang University Hospital:** Yoo Shin Choi, Mi Kyung Kim, Sung Eun Kim, Sung Bin Park\*

**Daejin Medical Center, Bundang Jesaeng General Hospital:** Young Rock Ha, Suk Ki Jang, Hyuk Jung Kim\*

**Hallym University Kangnam Sacred Heart Hospital:** Ji Young Woo\*

**Hallym University Sacred Heart Hospital:** Min-Jeong Kim\*

**Kangbuk Samsung Medical Center:** Pil Cho Choi, Sang Kuk Han, Mi Sung Kim\*, Heon-Ju Kwon, Dong Hyuk Shin

**Kangwon National University Hospital:** Seong Whi Cho\*, Chul Woo Park

**Korea University Ansan Hospital:** Sang Hoon Cha, Han Jin Cho\*, Suk Keu Yeom

**Korea University Guro Hospital:** Sung Hyuk Choi, Chang Hee Lee, Jongmee Lee\*, Yang Shin Park

**Seoul National University Bundang Hospital:** Soyeon Ahn, Yong Hwan Chung, Bon Seung Gu, Sung-Bum Kang, Bohyoung Kim, Joong Hee Kim, Kyuseok Kim, Young Hoon Kim, Hye Seung Lee, Jae Hyuk Lee, Kyoung Ho Lee, Yoon Jin Lee, Chan Jong Park, Ji Hoon Park\*, Hyun Kyung Yang

**Soonchunhyang University Bucheon Hospital:** Ho Jung Kim, Hae Kyung Lee, Min Hee Lee\*, Boem Ha Yi

**Soonchunhyang University Hospital:** Seong Sook Hong\*

\*Site principal investigator.
